# Supplementary material for: TEX44 CPT1B Axis Regulates Mitochondrial Sheath Assembly and Fatty Acid Oxidation in Sperm
Source: Research Square preprint supplement (doi:10.21203/rs.3.rs-5642169/v1), 2025-05-08
Supplement: Supplementary file 2 [file e0db81c79eb9c8d68ec70c2f.xlsx]

## Sheet: Fig.1E
Fig. 1E
	Mitochondrial sheath defects(%)
	Number of sperm analyzed	Number of sperm with mitochondrial sheath defects	Percentage of sperm with mitochondrial sheath defects
Control 1	200	26	13
Control 2	200	32	16
Control 3	200	10	5
Control 4	200	14	7
Control 5	200	44	22
Family 1 IV1	200	182	91
Family 2 II2	200	180	90
Family 3 II1	200	184	92
Family 4 II1	200	186	93
Family 5 II1	200	178	89

## Sheet: Fig.1F
Fig. 1E
	Control 1	Control 2	Control 3	Control 4	Control 5	Family 1 IV1	Family 2 II2	Family 3 II1	Family 4 II1	Family 5 II1
Sperm tail length (μm)	51.642	42.559	51.33	55.975	49.406	46.905	50.995	51.396	51.013	46.704
	40.171	43.078	48.603	55.389	55.543	49.462	49.517	55.547	58.339	48.804
	46.119	49.223	48.052	46.579	51.743	46.197	52.332	49.3	52.844	50.63
	44.077	51.877	52.031	53.423	48.209	47.411	50.088	43.612	47.749	51.908
	45.943	48.396	48.079	54.325	52.26	52.407	46.036	45.017	51.713	49.38
	44.017	45.617	59.947	51.671	50.226	41.43	51.736	53.153	53.686	55.997
	52.207	42.01	44.752	48.206	48.319	44.04	49.432	40.49	50.419	46.501
	42.94	43.925	52.676	51.977	47.635	47.547	48.151	54.236	47.927	52.254
	42.382	45.017	56.163	55.171	51.467	47.39	50.57	50.963	49.458	54.05
	43.249	50.964	48.938	48.997	48.358	52.692	46.789	47.941	50.211	45.973
	48.102	49.38	42.518	53.654	48.269	53.899	48.829	50.21	57.841	49.561
	45.442	51.605	54.543	48.537	53.112	50.939	49.989	54.372	48.863	54.281
	47.996	46.442	52.369	52.924	53.581	44.388	50.292	45.475	58.555	58.965
	50.662	51.256	60.335	51.095	50.918	51.831	50.765	45.125	51.285	50.384
	41.851	47.851	53.784	49.222	54.111	49.227	48.404	51.264	51.561	57.413
	40.965	45.176	52.229	49.109	50.035	50.9	44.118	52.433	50.754	51.693
	51.758	45.073	53.413	55.603	51.56	54.625	49.271	49.986	52.634	53.63
	46.398	44.308	52.867	49.225	46.662	56.374	52.999	51.411	48.55	51.713
	49.608	46.741	54.306	52.2	50.667	50.757	53.801	41.973	36.796	52.955
	50.173	50.609	51.015	49.059	50.811	52.657	48.293	50.073	49.649	49.559
	45.478	43.419	57.542	51.907	44.193	54.624	48.224	50.184	46.228	48.271
	46	49.352	54.069	51.087	48.215	52.524	46.428	56.281	49.563	54.426
	40.304	53.474	48.974	51.55	44.163	48.191	43.632	56.162	50.251	57.628
	44.033	51.128	52.37	49.172	47.453	50.5	52.657	48.177	54.547	55.631
	44.235	52.396	52.971	47.859	50.819	51.768	49.294	54.519	47.566	49.643
	48.193	46.846	47.556	49.674	47.527	48.176	45.287	49.196	48.544	47.11
	44.17	48.245	54.511	49.063	44.305	54.297	47.745	45.275	49.743	49.106
	49.747	59.039	56.594	44.506	48.524	51.751	49.199	54.111	46.778	51.302
	44.786	45.639	47.568	52.824	40.922	56.198	51.446	49.123	48.626	50.18
	48.269	49.103	45.368	50.378	47.698	46.606	46.083	50.196	44.528	52.019
mean(μm)	46.0306	47.9916	51.8491	51.012	49.2237	50.1904	49.0801	49.9067	50.2074	51.589

## Sheet: Fig.1H
Fig. 1H

## Sheet: Fig. 2C-D,G-H
In vitro fertilization(IVF)						Intra-cytoplasmic sperm injection(ICSI)
Fig. 2C						Fig. 2G
	Number of 2-cell embryos	Number of zygote	2-Cell (%)				Number of 2-cell embryos	Number of fertilized eggs	2-Cell (%)
Tex44+/+	25	40	62.5			Tex44+/+	26	29	89.66
	21	40	52.5				25	28	89.29
	23	40	58				29	31	94
Tex44 -/-	8	35	22.86			Tex44 -/-	27	27	100
	15	37	40.54				26	27	96.3
	12	40	30				25	28	89
Fig. 2D						Fig. 2H
	Number of blastocysts	Number of zygote	Blastocyst (%)				Number of blastocysts	Number of fertilized eggs	Blastocyst (%)
Tex44+/+	23	40	57.5			Tex44+/+	23	29	79.069
	17	40	42.5				20	28	72.8571
	20	40	50				23	31	75
Tex44 -/-	5	35	14.2857			Tex44 -/-	24	27	88.8889
	14	37	37.8378				25	27	92.5926
	10	40	25				21	28	75
2-Cell Rate = (Number of 2-cell embryos / Number of zygote) × 100						2-Cell Rate = (Number of 2-cell embryos / Number of fertilized eggs) × 100
Blastocyst Rate = (Number of blastocysts / Number of zygote) × 100						Blastocyst Rate = (Number of blastocysts / Number of fertilized eggs) × 100

## Sheet: Fig. 3A-B
Fig. 3A
Fig. 3B

## Sheet: Fig. 3G
Fig. 3G

## Sheet: Fig. 4E-F
Fig. 4E									Fig. 4F
Control				Cpt1b gKO					Tex44+/+			Tex44-/-
Distance (μm)	GPX4	TEX44		Distance (μm)	GPX4	TEX44			Distance (μm)	TOMM20	CPT1B	Distance (μm)	TOMM20	CPT1B
0	0	0		0	25	7			0	0	1	0	0	3
0.1575	0	0		0.16	28.172	13.253			0.1471	0.9789	7.6362	0.1493	0	4.544
0.315	0	0		0.32	30.253	19.545			0.2941	7.2818	21.1902	0.2985	2.172	10.571
0.4724	0	0		0.48	31.182	25.818			0.4412	22.6419	35.9991	0.4478	16.007	20.945
0.6299	0.719	0.794		0.64	32.152	34.848			0.5882	48.9797	47.1594	0.597	37.443	33.41
0.7874	5.419	5.257		0.8	32.939	43.131			0.7353	77.8975	53.1163	0.7463	61.368	46.631
0.9449	15.249	14.134		0.96	35.636	49.727			0.8824	95.8184	58.7263	0.8955	89.452	62.115
1.1024	30.93	28.304		1.12	40.626	54.646			1.0294	97.158	67.8387	1.0448	118.216	80.237
1.2598	49.074	44.13		1.28	45.182	59.788			1.1765	84.273	77.4464	1.194	141.561	98.468
1.4173	63.898	57.66		1.44	48.455	65.182			1.3235	64.637	79.6586	1.3433	153.209	109.649
1.5748	68.914	63.185		1.6	50.727	69.222			1.4706	45.7091	67.7535	1.4925	148.512	107.851
1.7323	63.069	61.402		1.76	53.222	73.444			1.6176	29.0051	48.3055	1.6418	130.408	95.012
1.8898	51.776	57.601		1.92	56.818	78.727			1.7647	14.3087	32.2422	1.791	103.83	76.213
2.0472	46.076	59.934		2.08	60.768	80.838			1.9118	4.3504	24.4376	1.9403	75.01	58.235
2.2047	61.527	72.853		2.24	59.919	81.394			2.0588	0.5616	22.9721	2.0896	48.039	45.034
2.3622	93.098	93.24		2.4	53.909	79.455			2.2059	0	22.0997	2.2388	27.01	37.936
2.5197	126.348	118.982		2.56	45.747	74.919			2.3529	0	19.4737	2.3881	15.885	36.532
2.6772	149.29	143.85		2.72	41.566	73.737			2.5	1.2842	18.3976	2.5373	10.508	36.987
2.8346	155.655	154.931		2.88	43.182	77.727			2.6471	7.5764	22.3895	2.6866	10.342	36.09
2.9921	148.934	150.342		3.04	48.465	83.343			2.7941	19.32	30.48	2.8358	16.117	34.721
3.1496	127.378	124.185		3.2	52.859	87.889			2.9412	36.6704	41.5789	2.9851	23.74	35.139
3.3071	98.078	89.54		3.36	57.455	89.727			3.0882	54.9987	53.0007	3.1343	34.875	38.967
3.4646	65.904	55.899		3.52	66.333	87.667			3.2353	69.4103	62.1586	3.2836	44.26	44.165
3.622	39.033	29.9		3.68	79.121	84.182			3.3824	80.0461	68.2396	3.4328	50.904	47.109
3.7795	19.843	13.56		3.84	93.909	80.364			3.5294	86.9025	70.7556	3.5821	55.619	46.758
3.937	8.945	4.595		4	107.131	77.354			3.6765	86.7064	69.5512	3.7313	60.552	48.202
4.0945	3.328	0.567		4.16	112.838	76.051			3.8235	76.0225	63.555	3.8806	70.294	55.211
4.252	1.643	0		4.32	109.909	75.636			3.9706	54.322	51.9165	4.0299	87.038	67.145
4.4094	1.133	0		4.48	103.465	73.859			4.1176	26.2796	34.7924	4.1791	103.228	80.815
4.5669	0.218	0		4.64	99.778	69.707			4.2647	6.8546	16.6572	4.3284	110.238	95.004
4.7244	0	0		4.8	103.545	63.909			4.4118	0.8643	4.4958	4.4776	103.391	105.45
4.8819	0	0		4.96	115.111	57.929			4.5588	2.3847	0.6359	4.6269	83.885	104.905
5.0394	0.553	0.184		5.12	127.727	53.96			4.7059	8.1714	2.0526	4.7761	61.308	89.428
5.1969	6.108	2.578		5.28	138	52			4.8529	15.0995	6.1263	4.9254	46.591	68.023
5.3543	21.64	18.398		5.44	141.99	54.172			5	23.0129	13.7887	5.0746	42.32	52.278
5.5118	43.248	42.575		5.6	140.545	57.768			5.1471	32.5235	26.4211	5.2239	46.125	47.912
5.6693	67.828	65.209		5.76	136	63.727			5.2941	42.4095	41.7793	5.3731	54.708	51.126
5.8268	93.684	80.82		5.92	131.051	69.03			5.4412	52.0762	56.0737	5.5224	61.517	53.325
5.9843	122.782	94.386		6.08	132.717	71.232			5.5882	62.2	65.04	5.6716	62.907	48.643
6.1417	156.086	112.137		6.24	138.727	73.636			5.7353	68.8737	66.8	5.8209	54.113	36.768
6.2992	189.549	137.178		6.4	138.818	79.879			5.8824	68.6343	61.0776	5.9701	37.884	23.598
6.4567	213.455	161.737		6.56	128.323	88.434			6.0294	60.7876	50.2421	6.1194	24.558	18.243
6.6142	215.406	169.872		6.72	106.818	94			6.1765	46.1276	38.5724	6.2687	13.783	19.752
6.7717	199.593	161.586		6.88	87.616	88.182			6.3235	26.912	27.9742	6.4179	6.07	25.1
6.9291	171.848	139.614		7.04	73.333	77.444			6.4706	11.0851	23.1807	6.5672	1.084	27.702
7.0866	140.767	115.495		7.2	63.091	67.818			6.6176	5.5235	26.4681	6.7164	0	27.239
7.2441	112.274	96.261		7.36	56.495	61.273			6.7647	14.4053	38.1158	6.8657	0	24.832
7.4016	89.867	88.523		7.52	49.071	58.263			6.9118	32.1661	52.7094	7.0149	0	23.5
7.5591	73.982	84.993		7.68	42.727	56.636			7.0588	48.0503	67.8988	7.1642	0	19.12
7.7165	62.496	78.281		7.84	41.051	53.576			7.2059	52.2106	78.5159	7.3134	0	12.223
7.874	53.794	65.637		8	43.293	50.455			7.3529	43.9889	81.2576	7.4627	0	5.171
8.0315	45.214	50.088		8.16	48.545	49.091			7.5	31.8219	73.6325	7.6119	0	1.52
8.189	37.545	34.729		8.32	54.091	54.424			7.6471	20.2832	57.7301	7.7612	0	0.745
8.3465	29.695	22.654		8.48	60.515	64.333			7.7941	10.2368	36.396	7.9104	0	0.879
8.5039	23.482	16.497		8.64	66.364	75			7.9412	3.0057	15.9741	8.0597	0.165	3.47
8.6614	17.761	12.838		8.8	71.333	82			8.0882	0.3407	3.5042	8.209	7.564	11.262
8.8189	12.496	9.54		8.96	73.879	83.879			8.2353	0	0.2901	8.3582	22.376	21.843
8.9764	8.035	5.883		9.12	72.909	85.182			8.3824	0	0.48	8.5075	37.156	32.294
9.1339	5.148	2.929		9.28	67.586	88.394			8.5294	0	1.4606	8.6567	52.196	40.086
9.2913	5.984	2.616		9.44	61.636	93.818			8.6765	1.5158	5.1477	8.806	64.508	43.415
9.4488	10.335	5.641		9.6	59.091	99.545			8.8235	6.964	13.7701	8.9552	70.287	43.352
9.6063	19.028	16.064		9.76	62.525	102.545			8.9706	16.7813	24.0113	9.1045	65.117	40.544
9.7638	31.486	34.114		9.92	70.091	102.909			9.1176	29.5196	33.1722	9.2537	47.191	35.638
9.9213	47.392	56.855		10.08	77.545	102			9.2647	41.4722	38.5895	9.403	23.785	27.681
10.0787	65.02	81.383		10.24	78.505	100.01			9.4118	49.6167	41.4196	9.5522	4.665	18.38
10.2362	82.414	106.763		10.4	76.505	97.152			9.5588	52.6011	43.8864	9.7015	0.637	10.101
10.3937	98.735	127.943		10.56	74	95			9.7059	52.3844	47.7323	9.8507	0	6.675
10.5512	109.022	137.307		10.72	71.101	90.323			9.8529	53.3001	51.945	10	4.656	9.963
10.7087	109.672	128.885		10.88	70	85.141			10	58.2383	52.9263	10.1493	12.4	20.278
10.8661	102.791	109.756		11.04	69.818	77			10.1471	65.69	47.988	10.2985	21.42	34.351
11.0236	87.409	87.515		11.2	70.172	66.495			10.2941	67.5679	38.2133	10.4478	32.646	47.768
11.1811	65.861	65.131		11.36	75.313	56.899			10.4412	58.7849	26.3579	10.597	44.478	57.515
11.3386	43.496	45.248		11.52	86.909	48.273			10.5882	41.2657	17.8316	10.7463	56.682	62.293
11.4961	29.181	32.204		11.68	104.455	40.929			10.7353	25.6954	18.6	10.8955	67.432	64.331
11.6535	25.381	30.763		11.84	121.747	36.818			10.8824	26.2668	29.4951	11.0448	73.408	62.112
11.811	23.496	38.018		12	135.455	34.545			11.0294	46.5429	45.6122	11.194	70.53	52.23
11.9685	20.864	50.212		12.16	145.091	34.051			11.1765	75.08	59.52	11.3433	57.051	37.394
12.126	19.292	64.913		12.32	149.444	37			11.3235	93.5496	64.5002	11.4925	37.957	25.681
12.2835	19.584	74.893		12.48	146.818	42.909			11.4706	92.3335	58.9919	11.6418	25.491	22.414
12.4409	24.702	75.564		12.64	133.414	51.061			11.6176	75.5433	50.3827	11.791	28.922	28.295
12.5984	33.594	62.993		12.8	112.586	57.707			11.7647	52.3407	42.6731	11.9403	46.702	39.589
12.7559	43.352	43.891		12.96	87.364	64.273			11.9118	30.8174	35.498	12.0896	69.871	54.808
12.9134	48.305	29.504		13.12	65.96	67.616			12.0588	14.4286	25.9549	12.2388	90.085	69.851
13.0709	49.745	21.258		13.28	50.354	67.04			12.2059	3.8702	15.1263	12.3881	100.18	81.799
13.2283	49.339	17.867		13.44	38.727	61.636			12.3529	0.3316	6.1737	12.5373	97.52	88.668
13.3858	47.761	15.756		13.6	31.758	49.152			12.5	0	1.5789	12.6866	82.116	89.118
13.5433	47.178	13.791		13.76	27.162	35.424			12.6471	0	0	12.8358	57.43	83.425
13.7008	49.823	18.442		13.92	25	23			12.7941	0	0	12.9851	32.505	71.647
13.8583	58.58	34.085		14.08	25.333	14.222			12.9412	0	0	13.1343	14.906	55.055
14.0157	72.702	56.692		14.24	26.747	10.061			13.0882	0	0	13.2836	5.482	33.986
14.1732	89.399	79.948		14.4	28.636	9.091			13.2353	0	0	13.4328	1.188	14.608
14.3307	103.892	99.477		14.56	28.96	9.303			13.3824	0	0	13.5821	0	3.191
14.4882	114.799	112.058		14.72	27.242	8.949			13.5294	0	0	13.7313	0	0
14.6457	123.965	120.439		14.88	22.182	6.909			13.6765	0	0	13.8806	0	0
14.8031	136.251	129.822		15.04	16.222	3.798			13.8235	0	0	14.0299	0	0
14.9606	158.756	145.071		15.2	12.333	2.747			13.9706	0	0
15.1181	180.779	156.572		15.36	12.727	3.545
15.2756	187.657	149.752		15.52	18.051	7.192
15.4331	175.398	127.647		15.68	27.879	12.323
15.5906	144.883	94.941		15.84	39	19
15.748	110.615	66.523
15.9055	80.599	52.082
16.063	59.388	49.609
16.2205	44.628	51.354
16.378	34.538	52.33
16.5354	27.428	51.387
16.6929	21.719	47.817
16.8504	16.752	40.407
17.0079	11.917	29.147
17.1654	7.867	17.451
17.3228	4.462	8.078
17.4803	1.442	2.71
17.6378	0	0.398
17.7953	0	3.75e-12

## Sheet: Fig. 5B
Fig. 5B
Relative intensity (normalized to Control)
	Control																Cpt1b gKO									Tex44-/-
L-palmitoylcarnitine	1.11824	1.37129	0.823991	1.06891	0.754876	1.39073	0.692398	0.779558	0.556948	0.711135	0.594045	1.64628	0.607723	1.80722	1.77153	0.305119	0.302677	0.237668	0.298772	0.183207	0.154135	0.093815	0.172454	0.156113	0.120044	3.58761	2.33587	1.51346	0.887786	2.51715	0.431019	3.32939	1.86462	5.44082
Myristoyl-l-carnitine	0.906264	1.18962	0.671877	0.597585	0.69418	1.35759	1.57214	1.01075	0.840264	1.38464	0.954807	2.57506	0.485086	0.475245	0.682716	0.602178	0.25952	0.273843	0.342357	0.124486	0.257274	0.067634	0.178814	0.191161	0.087449	5.24245	4.27658	2.65144	1.82988	2.52444	1.13363	8.38585	2.66154	8.76565
Butyrylcarnitine	1.3932	0.841836	0.879801	0.936392	1.29754	1.01205	0.411947	1.22723	0.450175	1.28106	0.994204	0.74119	1.24904	1.25297	1.53263	0.498718	1.73943	1.92582	1.90244	1.3967	1.17965	1.66013	1.10478	0.695275	0.811059	0.671952	0.860875	0.953559	0.809811	1.17691	0.568565	0.677865	1.1486	2.26067
Acetylcarnitine	1.7867	0.980932	1.34033	0.792323	0.949252	0.657947	0.259035	1.23348	0.357203	0.871543	1.21367	0.860682	1.2112	0.990289	1.75581	0.739598	2.05786	1.98595	1.83889	1.53842	1.28652	1.73315	0.731577	0.455422	0.577396	0.800245	0.964478	1.10101	0.876701	1.24305	0.883806	0.87195	0.871135	1.35316
Carnitine	1.77502	1.44311	0.363015	1.50151	1.00639	0.248947	0.30079	1.36122	0.989534	0.906443	0.714042	1.47413	0.517515	1.48879	1.21993	0.68962	0.469534	0.76253	1.27892	1.59714	0.471248	0.586082	1.6073	1.34887	0.394572	1.59137	1.27583	0.672075	1.42821	0.967196	0.427175	1.50778	1.65752	1.34244

## Sheet: Fig. 5D-E
Fig. 5D								Fig. 5E
								Relative CPT1B expression level
								Tex44+/+	Tex44-/-
								1	1.40227
								1	0.895935
								1	0.970152

## Sheet: Fig. 5H-J
Fig. 5H					Fig. 5I											Fig. 5J
CPT1B(μg)	△Absorbance412nm (CPT1B Activity )				TEX44 FL/CPT1B(μg/μg)	Normalized CPT1B Activity										TEX44-C/CPT1B(μg/μg)	Normalized CPT1B Activity
0	0.018	0.0172	0.0204		0	0.991263	1.01986	1.0556	0.9722	0.984114	1.02939	0.960286	0.976966	1.01033		0	1.00322	0.974205	1.01981	1.01151	0.974205	1.02395	1.00322	0.974205	1.01566
1.25	0.022	0.0178	0.0215		0.25	0.845909	0.953137	0.841144	0.805401	0.872121	0.805401	0.803018	0.867355	0.805401		0.25	1.14832	0.999079	0.990788	1.15246	0.990788	0.994933	1.15246	0.982497	0.990788
2.5	0.0224	0.0243	0.0226		0.5	0.807784	0.71247	0.860207	0.772041	0.843527	0.831612	0.760127	0.824464	0.824464		0.5	0.961769	1.00737	1.03224	0.965914	1.00322	1.02395	0.982497	1.01151	1.0281
5	0.0406	0.0384	0.0342		1	0.610008	0.855441	0.833995	0.579031	0.81255	0.788721	0.559968	0.810167	0.783956		1	1.04882	1.1193	1.0737	1.06126	1.1193	1.06541	1.05297	1.11515	1.06955
10	0.0502	0.0591	0.0589		1.5	0.810167	0.843527	0.853058	0.776807	0.824464	0.810167	0.760127	0.803018	0.798253		1.5	1.06541	1.05297	1.09028	1.00322	1.05297	1.09028	0.936895	1.04882	1.09443
20	0.1019	0.1058	0.1019		3	0.814932	0.77919	0.864972	0.774424	0.72915	0.819698	0.748213	0.714853	0.817315		3	1.28098	1.14832	1.1649	1.27269	1.14003	1.15661	1.22708	1.14417	1.14832

[truncated: 17 more sheets: Fig. 7B, Fig. 7D, Fig. 7F, Fig. S2B, Fig. S2D-G, Fig.S2J, Fig.S3B, Fig.S3C, Fig.S3E, Fig.S3G, Fig.S3L, Fig.S4A-B, Fig. S5A-C, Fig. S5G, Fig. S6B, Fig. S7, Fig.S8]
